# Supplementary material for: Drug‐Coated Balloons Versus Drug‐Eluting Stents or Plain Old Balloon Angioplasty: A Long‐Term in‐Stent Restenosis Study
Source: PubMed Central journal article supplement (PMC11681599; doi:10.1161/jaha.124.036839), 2024-11-22
Supplement: JAH3-13-e036839-s001.pdf [file JAH3-13-e036839-s001.pdf]

# Supplemental Material

**Table S1. Adjusting for variables with no missing values**

|                          | Adjusted HR, (95% CI) *            |                                     |
|--------------------------|------------------------------------|-------------------------------------|
|                          | DCB vs DES                         | DCB vs POBA                         |
| TLR                      | 1.22 (1.07-1.38)<br>p-value: 0.002 | 0.58 (0.47-0.70)<br>p-value: <0.001 |
| All-cause mortality      | 0.95 (0.84-1.07)<br>p-value: 0.379 | 0.66 (0.55-0.79)<br>p-value: <0.001 |
| Cardiovascular mortality | 0.87 (0.73-1.04)<br>p-value: 0.127 | 0.59 (0.46-0.77)<br>p-value: <0.001 |
| Myocardial infarction    | 1.06 (0.95-1.19)<br>p-value: 0.292 | 0.93 (0.76-1.13)<br>p-value: 0.444  |
| Any PCI                  | 0.98 (0.89-1.07)<br>p-value: 0.624 | 0.74 (0.62-0.87)<br>p-value: <0.001 |

\*Adjusted for: inclusion year, age, sex, diabetes mellitus, hypertension, previous heart failure, renal failure, previous myocardial infarction, previous coronary artery by-pass graft surgery, indication, number of lesions with ISR, lesion location, use of IVUS or OCT, ACC/AHA lesion classification, ISR-type (DES-ISR vs BMS-ISR), number of previous stents in target lesion (single vs multiple) and time to ISR (Early ISR [ $<31$  days] vs late ISR [31-365 days] vs very late ISR [ $>365$  days]).

ACC/AHA = American College of Cardiology/American Heart Association; CI = confidence interval; DCB = drug-coated balloon; DES = drug-eluting stent; HR = hazard ratio; ISR = in-stent restenosis; IVUS = intravascular ultrasound; OCT = optic coherence tomography; PCI = percutaneous coronary intervention; POBA = plain old balloon angioplasty; TLR = target lesion revascularization.

**Table S2. Exclusion of multiple-lesion PCI patients**

|                          | Events, (KM, %) |                |                | Unadjusted HR, (95% CI)             |                                     | Adjusted HR, (95% CI)*             |                                     |
|--------------------------|-----------------|----------------|----------------|-------------------------------------|-------------------------------------|------------------------------------|-------------------------------------|
|                          | DCB             | DES            | POBA           | DCB vs DES                          | DCB vs POBA                         | DCB vs DES                         | DCB vs POBA                         |
| TLR                      | 268<br>(24.7%)  | 320<br>(17.4%) | 95<br>(27.1%)  | 1.55 (1.32-1.82)<br>p-value: <0.001 | 0.73 (0.57-0.93)<br>p-value: 0.012  | 1.26 (1.06-1.51)<br>p-value: 0.010 | 0.50 (0.37-0.67)<br>p-value: <0.001 |
| All-cause mortality      | 228<br>(22.5%)  | 438<br>(23.0%) | 115<br>(32.2%) | 0.94 (0.79-1.08)<br>p-value: 0.335  | 0.58 (0.46-0.72)<br>p-value: <0.001 | 0.96 (0.80-1.14)<br>p-value: 0.611 | 0.73 (0.55-0.96)<br>p-value: 0.026  |
| Cardiovascular mortality | 105<br>(11.5%)  | 210<br>(12.4%) | 72<br>(22.3%)  | 0.89 (0.70-1.13)<br>p-value: 0.330  | 0.43 (0.32-0.58)<br>p-value: <0.001 | 0.89 (0.69-1.15)<br>p-value: 0.384 | 0.62 (0.42-0.91)<br>p-value: 0.015  |
| Myocardial infarction    | 316<br>(29.3%)  | 474<br>(25.6%) | 84<br>(26.1%)  | 1.20 (1.04-1.38)<br>p-value: 0.012  | 1.04 (0.81-1.32)<br>p-value: 0.769  | 1.13 (0.97-1.31)<br>p-value: 0.130 | 1.21 (0.91-1.62)<br>p-value: 0.196  |
| Any PCI                  | 393<br>(35.9%)  | 598<br>(30.6%) | 122<br>(34.5%) | 1.18 (1.04-1.34)<br>p-value: 0.010  | 0.84 (0.69-1.03)<br>p-value: 0.103  | 1.05 (0.92-1.20)<br>p-value: 0.484 | 0.69 (0.55-0.88)<br>p-value: 0.003  |

In this analysis all patient undergoing multiple-lesion PCI were excluded. The analysis

comprised 1453 patients treated with DCB, 2581 with DES and 431 with POBA.

\*Adjusted for: inclusion year, age, sex, smoking status, diabetes mellitus, hypertension, hyperlipidemia, previous heart failure, renal failure, previous myocardial infarction, previous coronary artery by-pass graft surgery, indication, number of lesions with ISR, lesion location, use of IVUS or OCT, ACC/AHA lesion classification, ISR-type (DES-ISR vs BMS-ISR), number of previous stents in target lesion (single vs multiple) and time to ISR (Early ISR [<31 days] vs late ISR [31-365 days] vs very late ISR [>365 days]).

ACC/AHA = American College of Cardiology/American Heart Association; CI = confidence interval; DCB = drug-coated balloon; DES = drug-eluting stent; HR = hazard ratio; ISR = in-stent restenosis; IVUS = intravascular ultrasound; KM = Kaplan-Meier estimates; OCT = optic coherence tomography; PCI = percutaneous coronary intervention; POBA = plain old balloon angioplasty; TLR = target lesion revascularization.

**Table S3. 1-year and 3-year follow-up**

|                          | Events, (KM, %) |                 |                | Unadjusted HR, (95% CI)             |                                     | Adjusted HR, (95% CI) *            |                                     |
|--------------------------|-----------------|-----------------|----------------|-------------------------------------|-------------------------------------|------------------------------------|-------------------------------------|
|                          | DCB             | DES             | POBA           | DCB vs DES                          | DCB vs POBA                         | DCB vs DES                         | DCB vs POBA                         |
| <b>1-year</b>            |                 |                 |                |                                     |                                     |                                    |                                     |
| TLR                      | 238<br>(7.9%)   | 311<br>(5.6%)   | 161<br>(16.3%) | 1.45 (1.27-1.66)<br>p-value: <0.001 | 0.43 (0.35-0.54)<br>p-value: <0.001 | 1.17 (1.02-1.34)<br>p-value: 0.028 | 0.31 (0.25-0.40)<br>p-value: <0.001 |
| All-cause mortality      | 134<br>(5.1%)   | 350<br>(6.7%)   | 132<br>(15.9%) | 0.75 (0.62-0.92)<br>p-value: 0.006  | 0.29 (0.23-0.37)<br>p-value: <0.001 | 0.81 (0.65-1.01)<br>p-value: 0.064 | 0.45 (0.33-0.62)<br>p-value: <0.001 |
| Cardiovascular mortality | 79<br>(3.3%)    | 215<br>(4.4%)   | 89<br>(11.5%)  | 0.73 (0.57-0.95)<br>p-value: 0.018  | 0.26 (0.19-0.35)<br>p-value: <0.001 | 0.78 (0.59-1.05)<br>p-value: 0.101 | 0.48 (0.32-0.71)<br>p-value: <0.001 |
| Myocardial infarction    | 262<br>(10.2%)  | 493<br>(9.7%)   | 123<br>(16.5%) | 1.04 (0.90-1.21)<br>p-value: 0.588  | 0.58 (0.46-0.71)<br>p-value: <0.001 | 0.96 (0.82-1.13)<br>p-value: 0.648 | 0.62 (0.48-0.79)<br>p-value: <0.001 |
| Any PCI                  | 394<br>(15.6%)  | 768<br>(15.1%)  | 177<br>(23.8%) | 1.00 (0.89-1.13)<br>p-value: 0.968  | 0.59 (0.49-0.70)<br>p-value: <0.001 | 0.93 (0.82-1.06)<br>p-value: 0.270 | 0.51 (0.41-0.62)<br>p-value: <0.001 |
| <b>3-year</b>            |                 |                 |                |                                     |                                     |                                    |                                     |
| TLR                      | 436<br>(16.6%)  | 554<br>(11.2%)  | 188<br>(19.9%) | 1.45 (1.27-1.65)<br>p-value: <0.001 | 0.68 (0.57-0.82)<br>p-value: <0.001 | 1.17 (1.02-1.34)<br>p-value: 0.028 | 0.50 (0.41-0.61)<br>p-value: <0.001 |
| All-cause mortality      | 304<br>(13.4%)  | 681<br>(14.5%)  | 194<br>(25.0%) | 0.89 (0.78-1.02)<br>p-value: 0.088  | 0.45 (0.38-0.54)<br>p-value: <0.001 | 0.89 (0.76-1.03)<br>p-value: 0.108 | 0.57 (0.45-0.71)<br>p-value: <0.001 |
| Cardiovascular mortality | 152<br>(7.5%)   | 359<br>(8.3%)   | 118<br>(16.3%) | 0.85 (0.70-1.03)<br>p-value: 0.088  | 0.37 (0.29-0.47)<br>p-value: <0.001 | 0.83 (0.67-1.02)<br>p-value: 0.073 | 0.56 (0.41-0.76)<br>p-value: <0.001 |
| Myocardial infarction    | 457<br>(20.2%)  | 794<br>(17.4%)  | 156<br>(22.5%) | 1.15 (1.02-1.28)<br>p-value: 0.021  | 0.79 (0.66-0.95)<br>p-value: 0.013  | 1.06 (0.94-1.20)<br>p-value: 0.325 | 0.86 (0.69-1.06)<br>p-value: 0.160  |
| Any PCI                  | 612<br>(26.8%)  | 1149<br>(24.9%) | 210<br>(29.8%) | 1.05 (0.96-1.16)<br>p-value: 0.282  | 0.77 (0.66-0.90)<br>p-value: 0.001  | 0.95 (0.85-1.05)<br>p-value: 0.310 | 0.67 (0.56-0.80)<br>p-value: <0.001 |

\*Adjusted for: inclusion year, age, sex, smoking status, diabetes mellitus, hypertension, hyperlipidemia, previous heart failure, renal failure, previous myocardial infarction, previous coronary artery by-pass graft surgery, indication, number of lesions with ISR, lesion location, use of IVUS or OCT, ACC/AHA lesion classification, ISR-type (DES-ISR vs BMS-ISR), number of previous stents in target lesion (single vs multiple) and time to ISR (Early ISR [<31 days] vs late ISR [31-365 days] vs very late ISR [>365 days]).

ACC/AHA = American College of Cardiology/American Heart Association; BMS = bare metal stent; CI = confidence interval; DCB = drug-coated balloon; DES = drug-eluting stent; HR = hazard ratio; ISR = in-stent restenosis; IVUS = intravascular ultrasound; KM = Kaplan-Meier estimates; OCT = optic coherence tomography; PCI = percutaneous coronary intervention; POBA = plain old balloon angioplasty; TLR = target lesion revascularization.

**Table S4. Landmark analysis**

|                          | Events, (KM, %) |                |                | Unadjusted HR, (95% CI)             |                                     | Adjusted HR, (95% CI) *             |                                    |
|--------------------------|-----------------|----------------|----------------|-------------------------------------|-------------------------------------|-------------------------------------|------------------------------------|
|                          | DCB             | DES            | POBA           | DCB vs DES                          | DCB vs POBA                         | DCB vs DES                          | DCB vs POBA                        |
| <b>1-to-5 years</b>      |                 |                |                |                                     |                                     |                                     |                                    |
| TLR                      | 267<br>(15.2%)  | 357<br>(10.5%) | 34<br>(6.4%)   | 1.45 (1.27-1.65)<br>p-value: <0.001 | 2.37 (1.65-3.41)<br>p-value: <0.001 | 1.17 (1.02-1.34)<br>p-value: 0.028  | 1.99 (1.32-3.00)<br>p-value: 0.001 |
| All-cause mortality      | 289<br>(17.8%)  | 550<br>(16.8%) | 103<br>(21.3%) | 1.06 (0.92-1.22)<br>p-value: 0.406  | 0.80 (0.64-1.00)<br>p-value: 0.052  | 0.99 (0.85-1.16)<br>p-value: 0.894  | 0.81 (0.62-1.05)<br>p-value: 0.118 |
| Cardiovascular mortality | 119<br>(8.5%)   | 236<br>(8.3%)  | 50<br>(11.9%)  | 1.02 (0.82-1.27)<br>p-value: 0.859  | 0.68 (0.49-0.95)<br>p-value: 0.024  | 0.89 (0.70-1.12)<br>p-value: 0.319  | 0.73 (0.49-1.08)<br>p-value: 0.111 |
| Myocardial infarction    | 273<br>(18.3%)  | 457<br>(15.7%) | 48<br>(12.8%)  | 1.22 (1.05-1.42)<br>p-value: 0.008  | 1.56 (1.15-2.12)<br>p-value: 0.004  | 1.18 (1.00-1.38)<br>p-value: 0.046  | 1.77 (1.23-2.54)<br>p-value: 0.002 |
| Any PCI                  | 297<br>(21.9%)  | 522<br>(18.6%) | 46<br>(12.7%)  | 1.17 (1.01-1.35)<br>p-value: 0.033  | 1.76 (0.29-2.40)<br>p-value: <0.001 | 1.02 (0.88-1.18)<br>p-value: 0.814  | 1.63 (1.15-2.34)<br>p-value: 0.007 |
| <b>3-to-5 years</b>      |                 |                |                |                                     |                                     |                                     |                                    |
| TLR                      | 69<br>(6.4%)    | 114<br>(4.9%)  | 7<br>(2.1%)    | 1.45 (1.27-1.65)<br>p-value: <0.001 | 3.11 (1.42-6.82)<br>p-value: 0.005  | 1.17 (1.02-1.34)<br>p-value: <0.028 | 3.11 (1.20-8.01)<br>p-value: 0.019 |
| All-cause mortality      | 119<br>(9.9%)   | 219<br>(9.1%)  | 41<br>(11.8%)  | 1.11 (0.89-1.38)<br>p-value: 0.375  | 0.82 (0.58-1.17)<br>p-value: 0.282  | 1.03 (0.81-1.32)<br>p-value: 0.784  | 0.91 (0.60-1.38)<br>p-value: 0.655 |
| Cardiovascular mortality | 46<br>(4.4%)    | 92<br>(4.4%)   | 21<br>(6.8%)   | 1.02 (0.71-1.45)<br>p-value: 0.928  | 0.62 (0.37-1.04)<br>p-value: 0.070  | 0.91 (0.62-1.33)<br>p-value: 0.612  | 0.73 (0.39-1.35)<br>p-value: 0.314 |
| Myocardial infarction    | 78<br>(8.1%)    | 156<br>(7.9%)  | 15<br>(6.0%)   | 1.04 (0.79-1.36)<br>p-value: 0.782  | 1.46 (0.84-2.53)<br>p-value: 0.183  | 1.03 (0.77-1.37)<br>p-value: 0.861  | 1.65 (0.87-3.13)<br>p-value: 0.129 |
| Any PCI                  | 79<br>(9.8%)    | 141<br>(7.9%)  | 13<br>(5.2%)   | 1.17 (0.89-1.55)<br>p-value: 0.253  | 1.73 (0.96-3.11)<br>p-value: 0.067  | 1.13 (0.85-1.51)<br>p-value: 0.401  | 1.87 (0.94-3.69)<br>p-value: 0.073 |

\*Adjusted for: inclusion year, age, sex, smoking status, diabetes mellitus, hypertension, hyperlipidemia, previous heart failure, renal failure, previous myocardial infarction, previous coronary artery by-pass graft surgery, indication, number of lesions with ISR, lesion location, use of IVUS or OCT, ACC/AHA lesion classification, ISR-type (DES-ISR vs BMS-ISR), number of previous stents in target lesion (single vs multiple) and time to ISR (Early ISR [<31 days] vs late ISR [31-365 days] vs very late ISR [>365 days]).

ACC/AHA = American College of Cardiology/American Heart Association; BMS = bare metal stent; CI = confidence interval; DCB = drug-coated balloon; DES = drug-eluting stent; HR = hazard ratio; ISR = in-stent restenosis; IVUS = intravascular ultrasound; KM = Kaplan-Meier estimates; OCT = optic coherence tomography; PCI = percutaneous coronary intervention; POBA = plain old balloon angioplasty; TLR = target lesion revascularization.

**Table S5. DES-ISR vs BMS-ISR**

|                          | Events (KM, %)  |                | HR, (95% CI)                        |                                     |
|--------------------------|-----------------|----------------|-------------------------------------|-------------------------------------|
|                          | DES-ISR         | BMS-ISR        | Unadjusted                          | Adjusted*                           |
| TLR                      | 1091<br>(21.1%) | 275<br>(12.0%) | 1.88 (1.64-2.16)<br>p-value: <0.001 | 1.39 (1.19-1.62)<br>p-value: <0.001 |
| All-cause mortality      | 1116<br>(24.7%) | 406<br>(19.8%) | 1.30 (1.16-1.46)<br>p-value: <0.001 | 1.09 (0.95-1.24)<br>p-value: 0.215  |
| Cardiovascular mortality | 565<br>(14.0%)  | 206<br>(10.8%) | 1.32 (1.12-1.54)<br>p-value: 0.001  | 1.07 (0.89-1.29)<br>p-value: 0.465  |
| Myocardial infarction    | 1247<br>(27.7%) | 380<br>(19.1%) | 1.59 (1.42-1.78)<br>p-value: <0.001 | 1.34 (1.18-1.52)<br>p-value: <0.001 |
| Any PCI                  | 1617<br>(34.7%) | 550<br>(26.3%) | 1.39 (1.26-1.53)<br>p-value: <0.001 | 1.16 (1.04-1.30)<br>p-value: 0.007  |

\*Adjusted for: inclusion year, age, sex, smoking status, diabetes mellitus, hypertension, hyperlipidemia, previous heart failure, renal failure, previous myocardial infarction, previous coronary artery by-pass graft surgery, indication, number of lesions with ISR, lesion location, use of IVUS or OCT, ACC/AHA lesion classification, treatment strategy (DCB, DES and POBA), number of previous stents in target lesion (single vs multiple) and time to ISR (Early ISR [<31 days] vs late ISR [31-365 days] vs very late ISR [>365 days]).

ACC/AHA = American College of Cardiology/American Heart Association; CI = confidence interval; BMS = bare metal stent; DCB = drug-coated balloon; DES = drug-eluting stent; HR = hazard ratio; ISR = in-stent restenosis; IVUS = intravascular ultrasound; KM = Kaplan-Meier estimates; OCT = optic coherence tomography; PCI = percutaneous coronary intervention; POBA = plain old balloon angioplasty; TLR = target lesion revascularization.

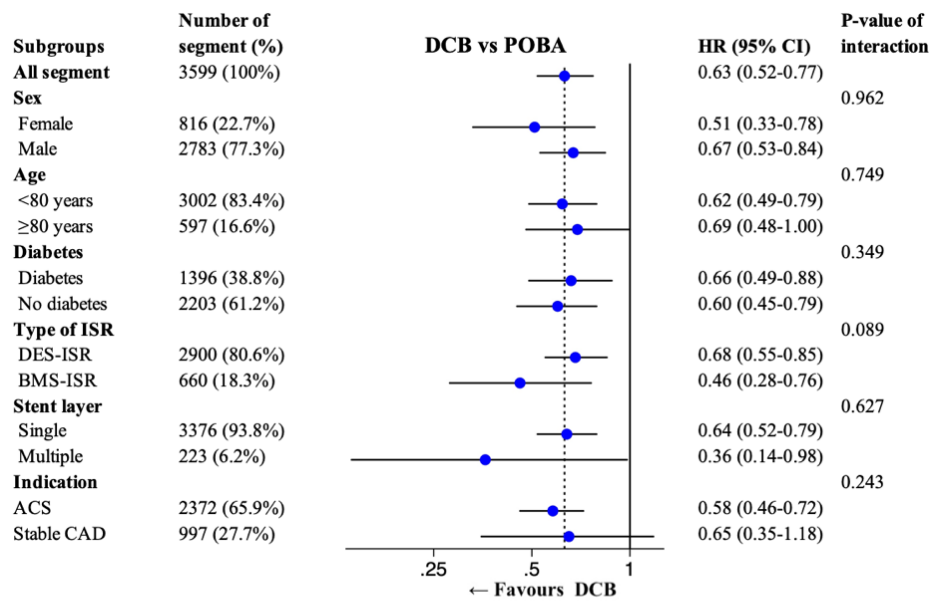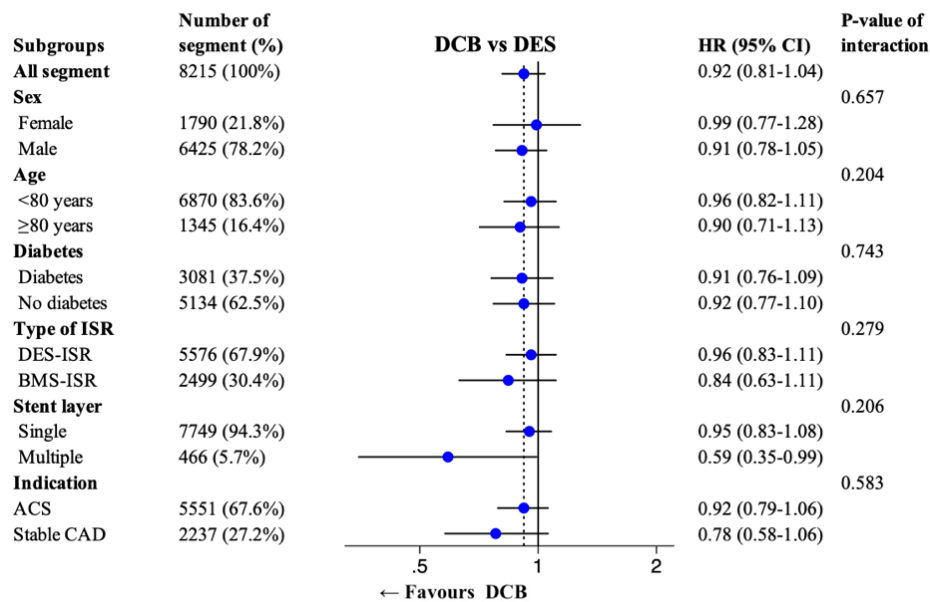

**Figure S1. Subgroup analysis on all-cause mortality, Forest plot for subgroup analysis.**

The subgroups were analysed on all-cause mortality using an adjusted\* Cox regression model.

ACC/AHA = American College of Cardiology/American Heart Association; ACS = acute coronary syndrome; BMS = bare metal stent; CI = confidence interval; DCB = drug-coated balloon; DES = drug-eluting stent; HR = hazard ratio; ISR = in-stent restenosis; IVUS = intravascular ultrasound; OCT = optic coherence tomography; POBA = plain old balloon angioplasty.

\*Adjusted for: inclusion year, age, sex, smoking status, diabetes mellitus, hypertension, hyperlipidemia, previous heart failure, renal failure, previous myocardial infarction, previous coronary artery by-pass graft surgery, indication, number of lesions with ISR, lesion location, use of IVUS or OCT, ACC/AHA lesion classification, ISR-type (DES-ISR vs BMS-ISR), number of previous stents in target lesion (single vs multiple) and time to ISR (Early ISR [<31 days] vs late ISR [31-365 days] vs very late ISR [>365 days]).



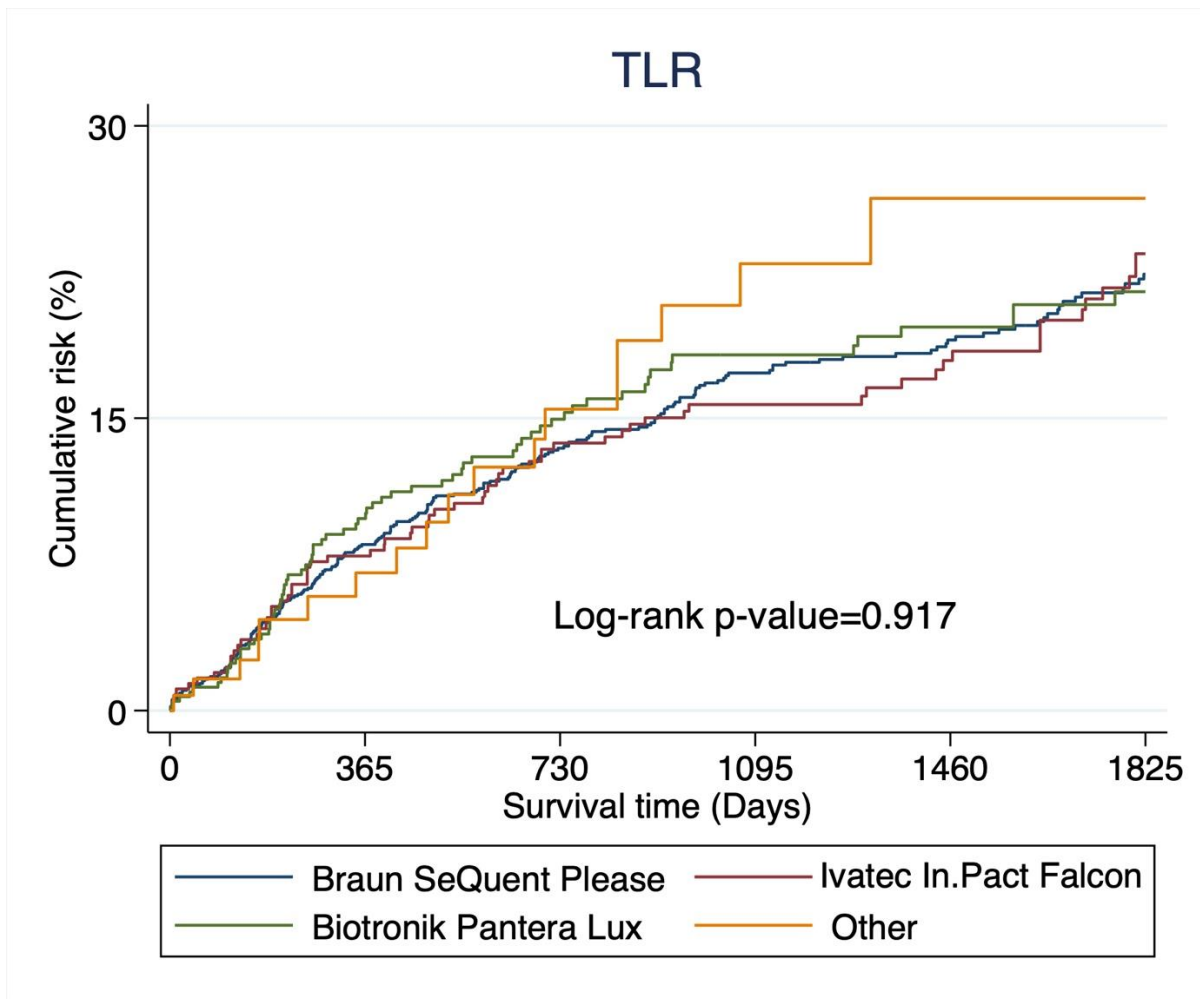

**Figure S2. Different types of DCB, Time-to-event Kaplan Meier curve illustrating the event rate of TLR for different types of DCB. DCB = drug-coated balloon; TLR = target lesion revascularization.**

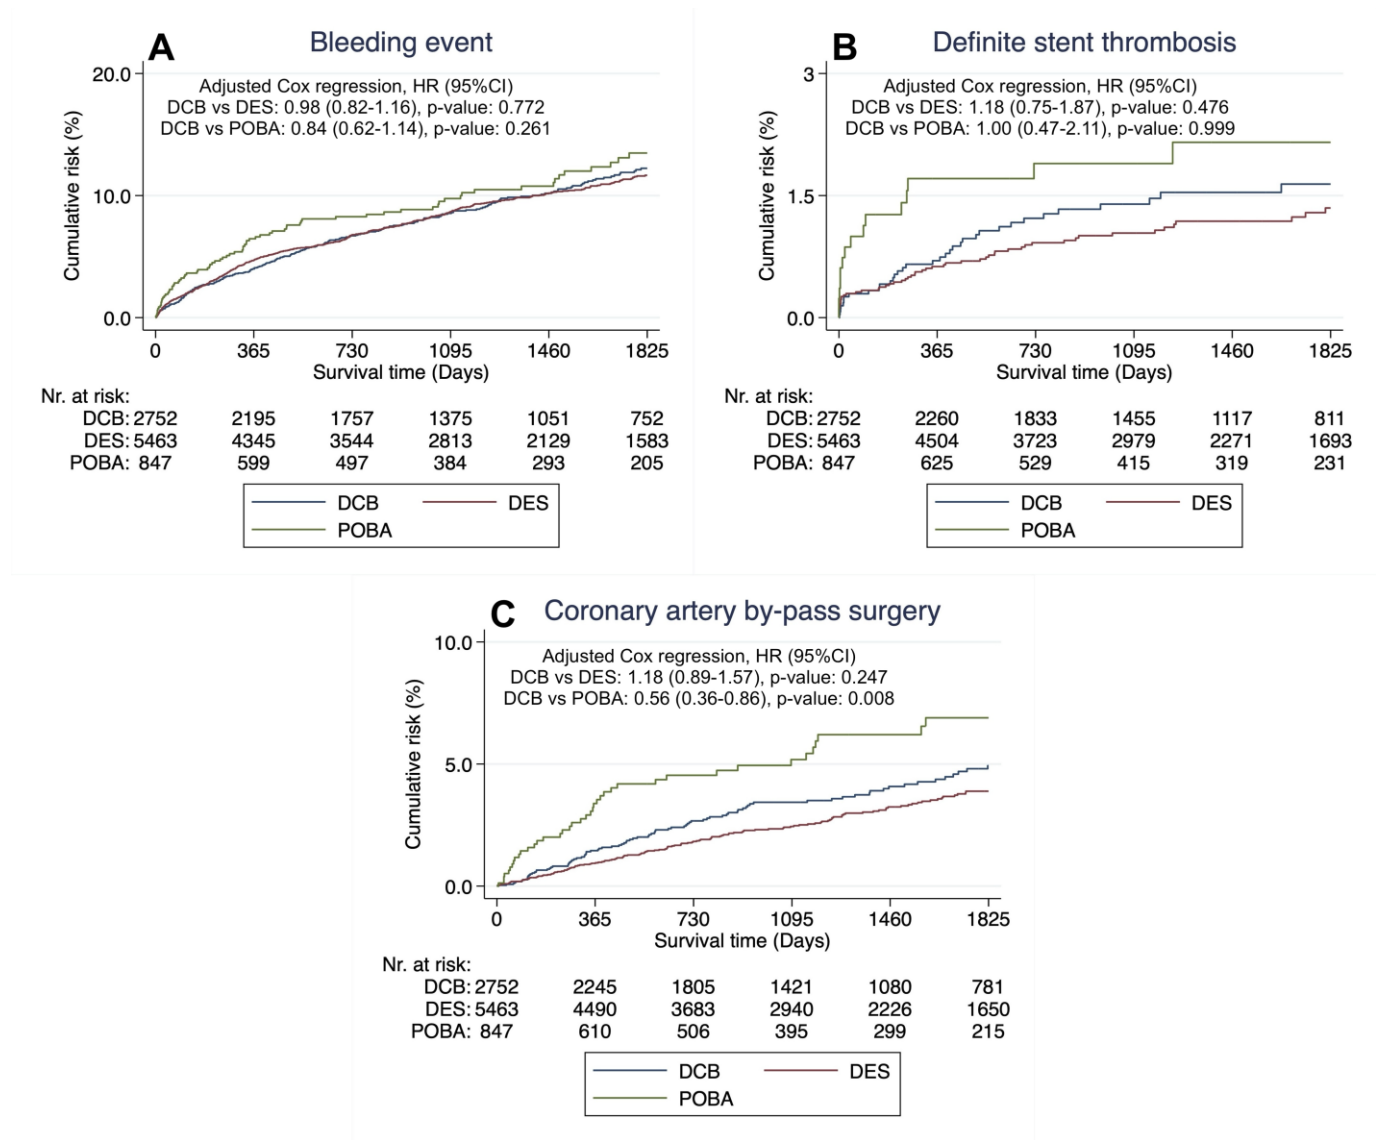

**Figure S3. Bleeding event, definite stent thrombosis and coronary artery by-pass surgery,** Time-to-event Kaplan Meier curves illustrating the event rate of (A) bleeding event, (B) definite stent thrombosis and (C) coronary artery by-pass graft surgery. In the Cox regression analysis we adjusted for: inclusion year, age, sex, smoking status, diabetes mellitus, hypertension, hyperlipidemia, previous heart failure, renal failure, previous myocardial infarction, previous coronary artery by-pass graft surgery, indication, number of lesions with ISR, lesion location, use of IVUS or OCT, ACC/AHA lesion classification, ISR-type (DES-ISR vs BMS-ISR), number of previous stents in target lesion (single vs multiple) and time to ISR (Early ISR [ $<31$  days] vs late ISR [31-365 days] vs very late ISR [ $>365$  days]).

days]). ACC/AHA = American College of Cardiology/American Heart Association; CI = confidence interval; BMS = bare metal stent; DCB = drug-coated balloon; DES = drug-eluting stent; HR = hazard ratio; ISR = in-stent restenosis; IVUS = intravascular ultrasound; OCT = optic coherence tomography; POBA = plain old balloon angioplasty.
